# Supplementary material
Source: PubMed Central journal article supplement (PMC3699006)

Figure S1

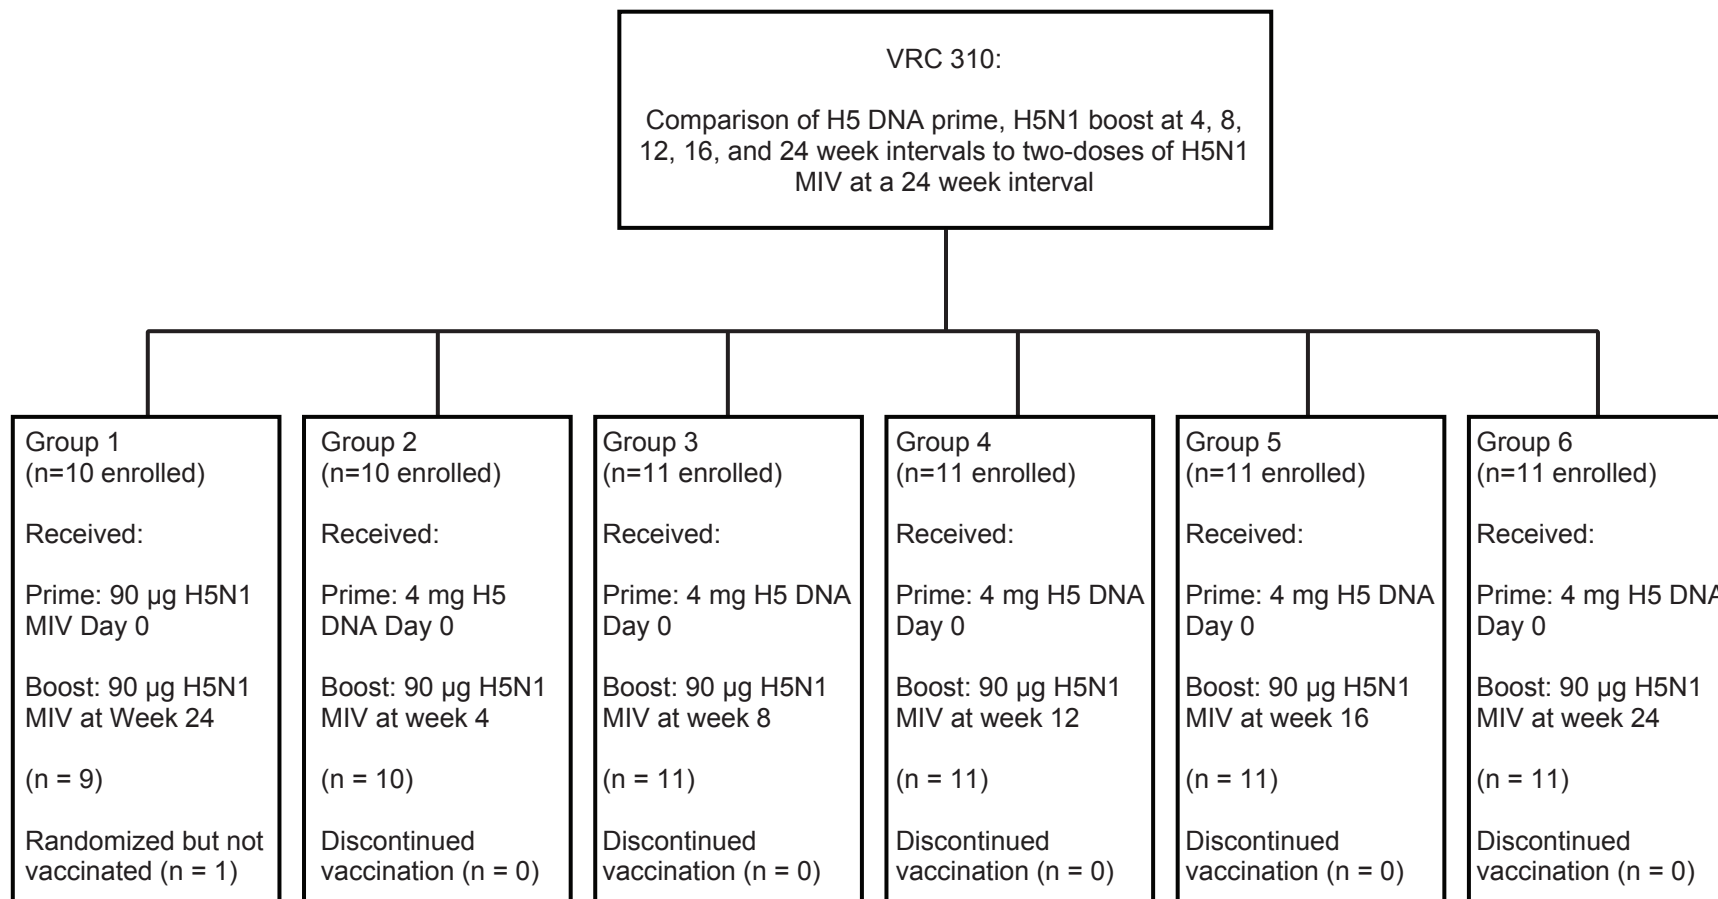

Supplement: supp_jit180_jit180supp_fig.pdf [file supp_jit180_jit180supp_fig.pdf]
